# Supplementary material
Source: Springer Nature journal article supplement (https://www.springermedizin.de/resource/supplementary/12997_2006_32_MOESM1_ESM.pdf/9623148)

**Control (n=4)**

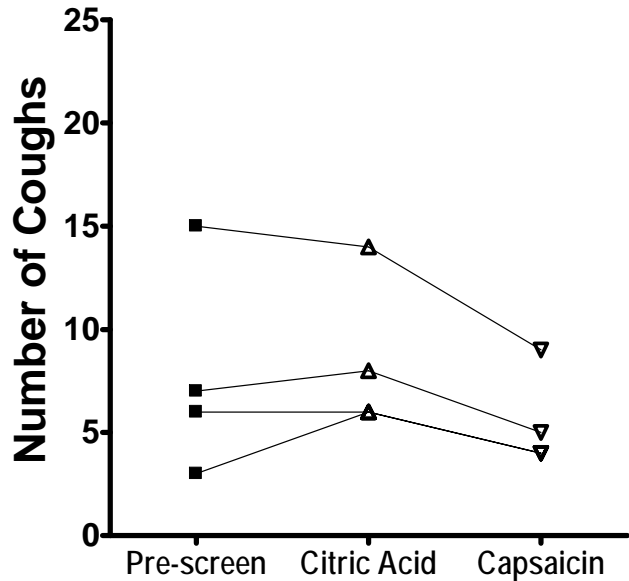

**Vehicle (n=5)**

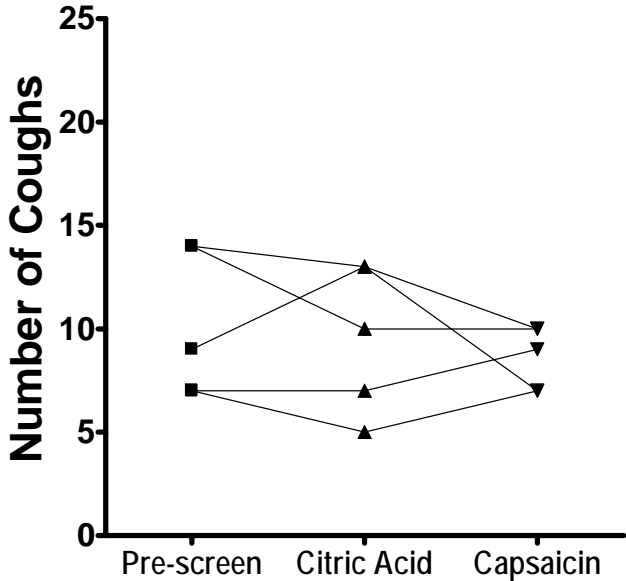

**V112220 (n=5)**

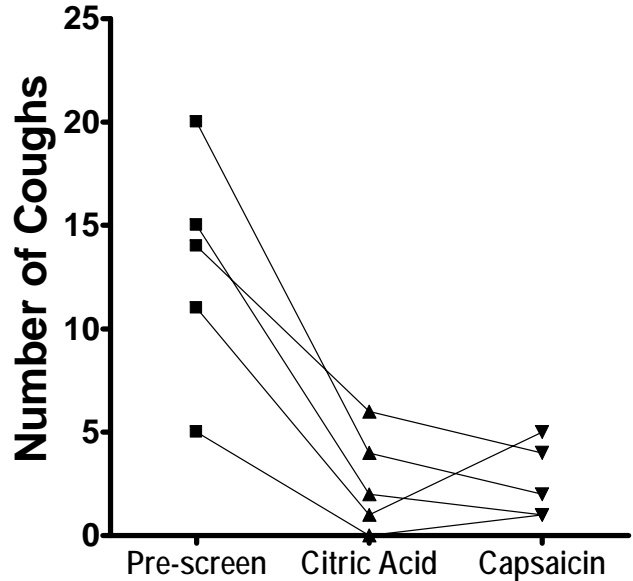

Supplement: MOESM1 [file 9623148]
